# Supplementary material for: Profiling of Dust and Urban Haze Mass Concentrations during the 2019 National Day Parade in Beijing by Polarization Raman Lidar
Source: MDPI journal article supplement (doi:10.3390/rs13163326), 2021-08-23
Supplement: s1 [file s1]

# **Supplementary Materials for Profiling of Dust and Urban Haze Mass Concentrations during the 2019 National Day Parade in Beijing by Polarization Raman Lidar**

**Zhuang Wang<sup>1,2</sup>, Cheng Liu<sup>2,3,1,4,5</sup>, Yunsheng Dong<sup>1</sup>, Qihou Hu<sup>1</sup>, Ting Liu<sup>6</sup>, Yizhi Zhu<sup>1,2</sup>, Chengzhi Xing<sup>1\*</sup>**

<sup>1</sup> Key Lab of Environmental Optics & Technology, Anhui Institute of Optics and Fine Mechanics, Hefei Institutes of Physical Science, Chinese Academy of Sciences, Hefei 230031, China.

<sup>2</sup> Department of Precision Machinery and Precision Instrumentation, University of Science and Technology of China, Hefei 230026, China

<sup>3</sup> Center for Excellence in Regional Atmospheric Environment, Institute of Urban Environment, Chinese Academy of Sciences, Xiamen 361021, China

<sup>4</sup> Key Laboratory of Precision Scientific Instrumentation of Anhui Higher Education Institutes, University of Science and Technology of China, Hefei 230026, China.

<sup>5</sup> Anhui Province Key Laboratory of Polar Environment and Global Change, University of Science and Technology of China, Hefei 230026, China.

<sup>6</sup> Department of Environmental Science and Engineering, University of Science and Technology of China, Hefei 230026, China.

\* Correspondence: Chengzhi Xing (xingcz00@mail.ustc.edu.cn)

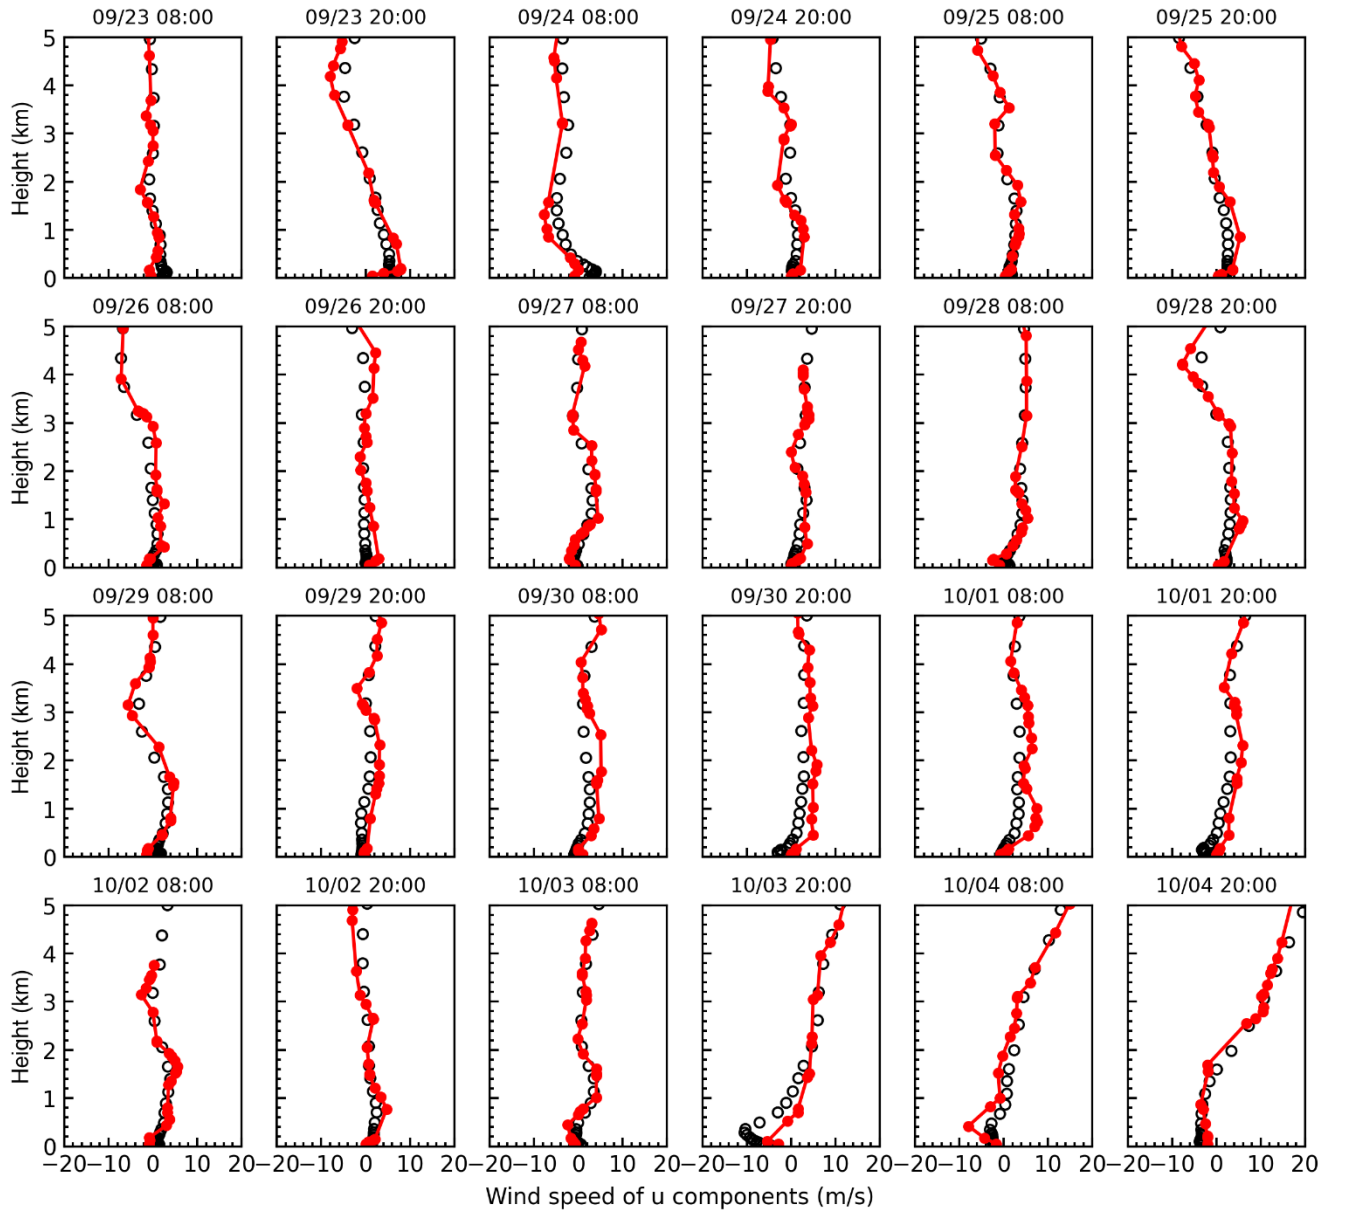

**Figure S1.** Comparison of wind speed (u components) between WRF-Chem simulations (black circle) and observations (red dots). The sounding site ( $39.93^{\circ}\text{N}$ ,  $116.28^{\circ}\text{E}$ ) is located at about 22 km north of measurement site. The comparison date (local time) is shown at the top of each subplot.

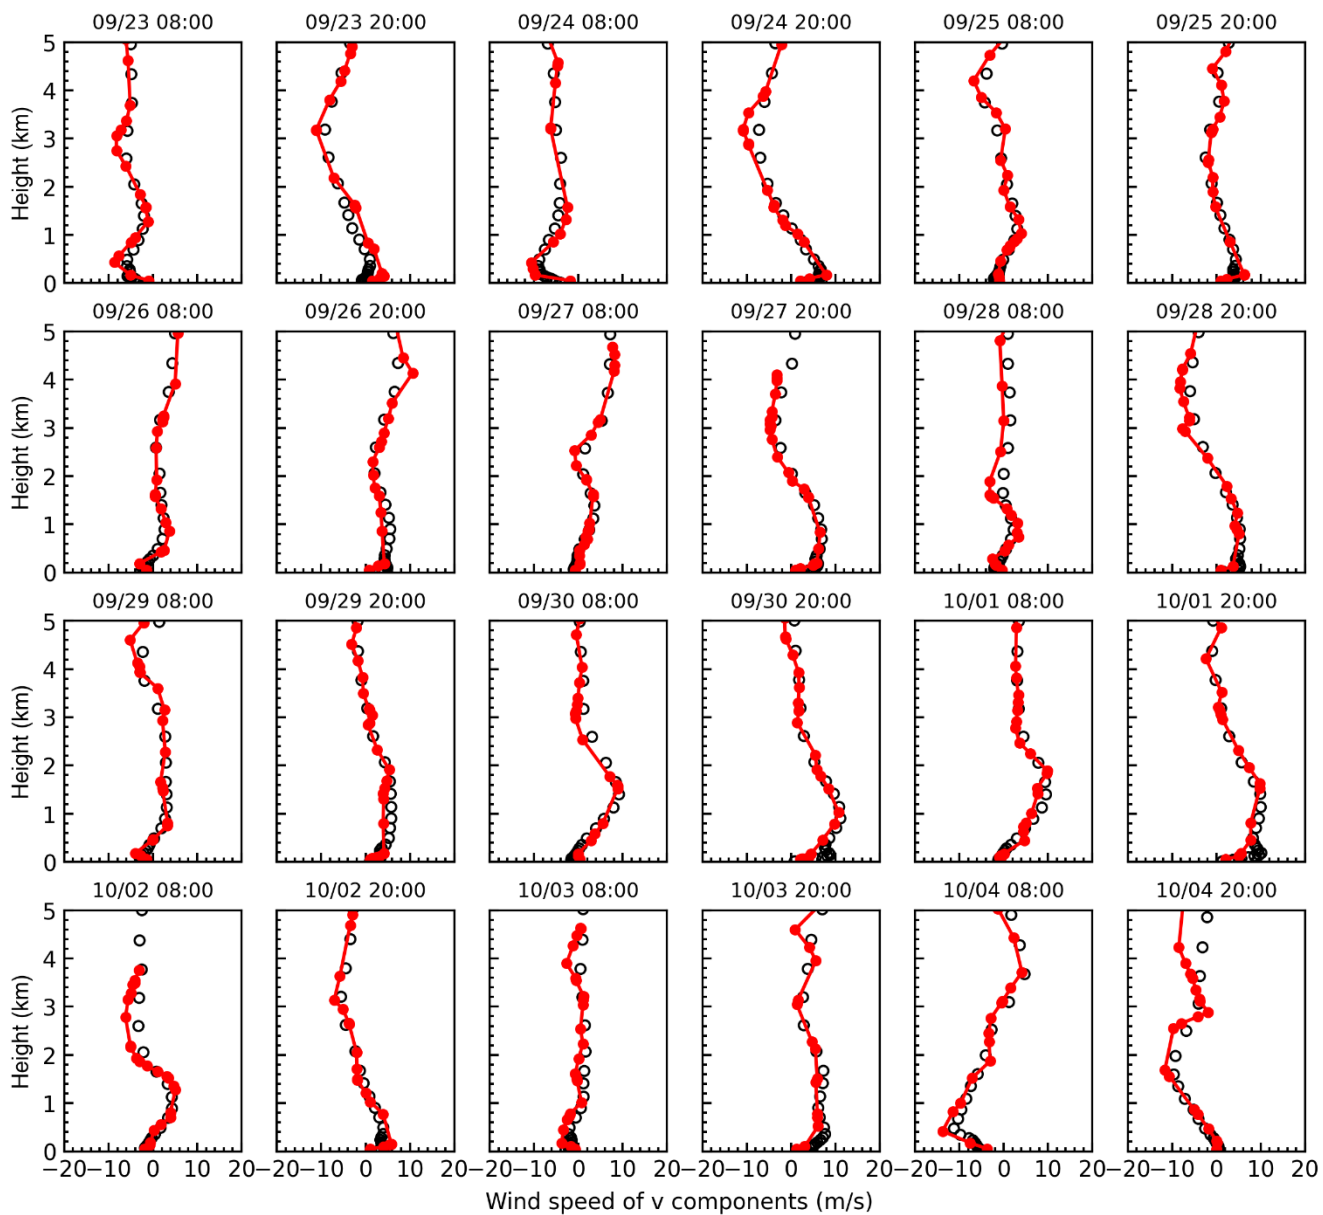

**Figure S2.** The same Figure S1 but for v components.

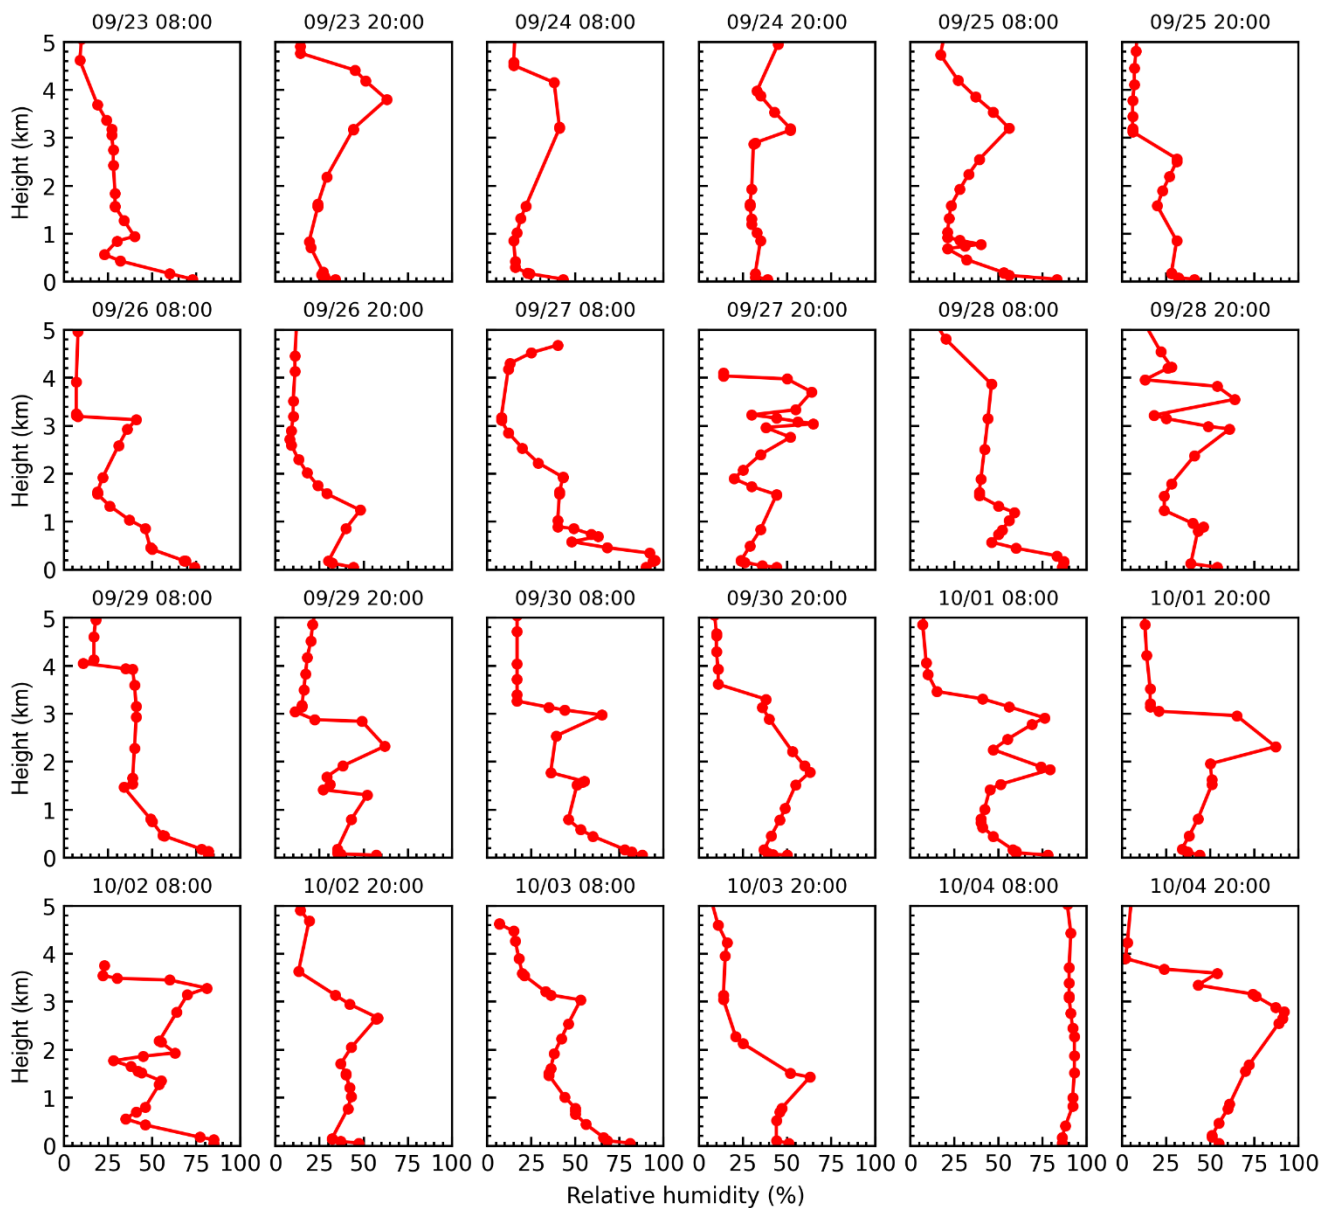

**Figure S3.** Relative humidity sounding profile during 23 September to 4 October. The sounding site ( $39.93^{\circ}\text{N}$ ,  $116.28^{\circ}\text{E}$ ) is located at about 22 km north of measurement site. The date (local time) is shown at the top of each subplot.
